# Supplementary material for: Calpain fosters the hyperexcitability of motoneurons after spinal cord injury and leads to spasticity
Source: eLife. 2019 Dec 9;8:e51404. doi: 10.7554/eLife.51404 (PMC6927741; doi:10.7554/eLife.51404)
Supplement: Figure 1—figure supplement 1—source data 1. [file elife-51404-fig1-figsupp1-data1.xlsx]

## Sheet: Figure 1-figure supplement 1
	MDL28170 (60 mg/kg) (n=5 rats)
Time postinjection (hour)	control	1	2	3	4	5	7
	number of twitches
Animal 1	15	10	10	16	22	16	16
Animal 2	14	14	8	32	14	12	4
Animal 3	16	14	18	18	10	20	20
Animal 4	8	10	18	10	2	8	16
Animal 5	16	28	6	6	20	0	0
Animal 6	28	10	20	16	10	26	16
Mean	16.17	14.33	13.33	16.33	13	13.67	12
Std. Deviation	6.524	6.976	6.022	8.892	7.348	9.158	8
Std. Error	2.664	2.848	2.459	3.63	3	3.739	3.266
Lower 95% CI of mean	9.32	7.012	7.013	7.002	5.288	4.056	3.604
Upper 95% CI of mean	23.01	21.65	19.65	25.66	20.71	23.28	20.4
Repeated Measures ANOVA
Dunnett's Multiple Comparison Test	Mean Diff.	q	Significant? P < 0.05?	Summary	95% CI of diff
control vs 1 hour	1.833	0.4204	No	ns	-10.03 to 13.70
control vs 2 hours	2.833	0.6497	No	ns	-9.029 to 14.70
control vs 3 hours	-0.1667	0.03822	No	ns	-12.03 to 11.70
control vs 4 hours	3.167	0.7261	No	ns	-8.695 to 15.03
control vs 5 hours	2.5	0.5732	No	ns	-9.362 to 14.36
control vs 7 hours	4.167	0.9554	No	ns	-7.695 to 16.03
