# Supplementary material for: Calpain fosters the hyperexcitability of motoneurons after spinal cord injury and leads to spasticity
Source: eLife. 2019 Dec 9;8:e51404. doi: 10.7554/eLife.51404 (PMC6927741; doi:10.7554/eLife.51404)
Supplement: Figure 1—source data 1. [file elife-51404-fig1-data1.xlsx]

## Sheet: Fig 1C
	Duration of EMG responses (s)
	Sham (n=6 rats)	SCI (n=8rats)
	6.48812	35.0551
	4.71742	18.9513
	7.50412	40.0503
	8.96084	17.6866
	3.13375	13.7379
	4.873	30.417
		30.4792
		26.2945
Mean	5.946	26.58
Std. Deviation	2.116	9.146
Std. Error	0.8637	3.233
Lower 95% CI of mean	3.726	18.94
Upper 95% CI of mean	8.166	34.23
Mann Whitney test (Sham vs SCI)
P value	0.0007

## Sheet: Fig 1D
	Threshold (g)
	Sham (n=6 rats)	SCI (n=8rats)
	243.52	73.7809
	152.254	104.297
	138.699	69.5894
	70.8159	96.444
	76.8124	60.8857
	129.902	52.6479
		39.7709
		78.1463
Mean	135.3	71.95
Std. Deviation	62.64	21.46
Std. Error	25.57	7.588
Lower 95% CI of mean	69.6	54
Upper 95% CI of mean	201.1	89.89
Mann Whitney test (Sham vs SCI)
P value	0.0293

## Sheet: Fig 1E
	Number of twitches
	Sham (n=22 rats)	SCI (n=22 rats)
	15	71
	14	69
	16	57
	8	66
	16	83
	28	66
	8	72
	18	77
	14	68
	18	79
	22	68
	2	44
	18	55
	18	81
	21	63
	24	74
	22	83
	9	70
	10	66
	8	66
	14	69
	9	64
Mean	15.09	68.68
Std. Deviation	6.316	9.26
Std. Error	1.347	1.974
Lower 95% CI of mean	12.29	64.58
Upper 95% CI of mean	17.89	72.79
Mann Whitney test (Sham vs SCI)
P value	< 0.0001

## Sheet: Fig 1F
	MDL28170 (60 mg/kg) (n=5 rats)										MDL28170 (120 mg/kg) (n=5 rats)												DMSO (n=5 rats)
Time postinjection (hour)	control	1	2	3	4	5	7			Time postinjection (hour)	control	1	2	3	4	5	7	9	24			Time postinjection (hour)	control	1	2	3	4	5	7
	Number of twitches										Number of twitches												Number of twitches
Animal 1	91	56	61	56	65	75				Animal 1	71	21	22	18	12	16	30	48	69			Animal 1	66	53	61	75	96	79
Animal 2	65	27	33	37	44	57				Animal 2	69	30	23	20	24	26	36	52	66			Animal 2	72	59	82	73	70	56
Animal 3	58	50	61	48	65	61				Animal 3	57	42	19	18	26	26	48	52	57			Animal 3	77	91	78	64	85	97	100
Animal 4	79	55	61	53	51	74	87			Animal 4	66	40	27	36	22	15	38	59	66			Animal 4	68	66	63	48	68	58	59
Animal 5	65	66	58	59	69	75	63			Animal 5	83	35	23	10	15	31	42	50	86			Animal 5	79	73	77	77	73	79	62
Mean	71.6	50.8	54.8	50.6	58.8	68.4	75			Mean	69.2	33.6	22.8	20.4	19.8	22.8	38.8	52.2	68.8			Mean	72.4	68.4	72.2	67.4	78.4	73.8	73.67
Std. Deviation	13.26	14.52	12.26	8.62	10.73	8.706	16.97			Std. Deviation	9.391	8.444	2.864	9.529	6.017	6.979	6.723	4.147	10.62			Std. Deviation	5.595	14.69	9.524	11.93	11.84	17.02	22.85
Std. Error	5.93	6.492	5.481	3.855	4.8	3.894	12			Std. Error	4.2	3.776	1.281	4.261	2.691	3.121	3.007	1.855	4.748			Std. Error	2.502	6.57	4.259	5.335	5.297	7.612	13.2
Lower 95% CI of mean	55.14	32.78	39.58	39.9	45.47	57.59	-77.47			Lower 95% CI of mean	57.54	23.12	19.24	8.568	12.33	14.13	30.45	47.05	55.62			Lower 95% CI of mean	65.45	50.16	60.37	52.59	63.69	52.67	16.89
Upper 95% CI of mean	88.06	68.82	70.02	61.3	72.13	79.21	227.5			Upper 95% CI of mean	80.86	44.08	26.36	32.23	27.27	31.47	47.15	57.35	81.98			Upper 95% CI of mean	79.35	86.64	84.03	82.21	93.11	94.93	130.4
Repeated Measures ANOVA										Repeated Measures ANOVA
Dunnett's Comparison Test	Mean Diff.	q	Significant? P < 0.05?	Summary	95% CI of diff					Dunnett's Comparison Test	Mean Diff.	q	Significant? P < 0.05?	Summary	95% CI of diff							Dunnett's Multiple Comparison Test	Mean Diff.	q	Significant? P < 0.05?	Summary	95% CI of diff
control vs 1 hour	20.8	4.297	Yes	**	7.439 to 34.16					control vs 1 hour	35.6	8.103	Yes	***	23.26 to 47.94							control vs 1 hour	4	0.6148	No	ns	-13.96 to 21.96
control vs 2 hours	16.8	3.471	Yes	**	3.439 to 30.16					control vs 2 hours	46.4	10.56	Yes	***	34.06 to 58.74							control vs 2 hours	0.2	0.03074	No	ns	-17.76 to 18.16
control vs 3 hours	21	4.338	Yes	**	7.639 to 34.36					control vs 3 hours	48.8	11.11	Yes	***	36.46 to 61.14							control vs 3 hours	5	0.7685	No	ns	-12.96 to 22.96
control vs 4 hours	13.4	2.768	Yes	*	0.03876 to 26.76					control vs 4 hours	49.4	11.24	Yes	***	37.06 to 61.74							control vs 4 hours	-6	0.9222	No	ns	-23.96 to 11.96
control vs 7 hours	3.2	0.6611	No	ns	-10.16 to 16.56					control vs 7 hours	46.4	10.56	Yes	***	34.06 to 58.74							control vs 7 hours	-1.4	0.2152	No	ns	-19.36 to 16.56
										control vs 9 hours	30.4	6.92	Yes	***	18.06 to 42.74
										control vs 24 hours	17	3.87	Yes	**	4.662 to 29.34

## Sheet: Fig 1G
	Threshold (g)					Duration of EMG responses (s)
	SCI+DMSO (n=9 rats)	SCI+MDL (n=6 rats)				SCI+DMSO (n=9 rats)	SCI+MDL (n=6 rats)
	37.3946	74.4395				46.05	20.4666
	50.7346	28.7635				20.8937	20.2391
	73.4013	6.99311				18.766	10.6638
	69.5894	29.7968				22.2407	13.0511
	73.7809	27.7079				35.0551	17.1032
	104.297	119.535				18.9513	20.58
	69.5894					40.0503
	52.6479					35.4171
	39.7709					35.4792
Mean	63.47	47.87				30.32	17.02
Std. Deviation	20.82	41.5				10.21	4.268
Std. Error	6.94	16.94				3.403	1.742
Lower 95% CI of mean	47.46	4.322				22.47	12.54
Upper 95% CI of mean	79.47	91.42				38.17	21.5
Mann Whitney test (SCI+DMSO vs SCI+MDL)					Mann Whitney test (SCI+DMSO vs SCI+MDL)
P value	0.2721				P value	0.012
