# Supplementary material for: Calpain fosters the hyperexcitability of motoneurons after spinal cord injury and leads to spasticity
Source: eLife. 2019 Dec 9;8:e51404. doi: 10.7554/eLife.51404 (PMC6927741; doi:10.7554/eLife.51404)
Supplement: Figure 2—source data 1. [file elife-51404-fig2-data1.xlsx]

## Sheet: Fig 2
		quantification band calpain 1					quantification band calpain 1					quantification band calpain 2
		110 Kd					80 Kd
		Sham (n= 4 rats)	SCI (n= 4 rats)				Sham (n= 4 rats)	SCI (n= 4 rats)				Sham (n= 4 rats)	SCI (n= 4 rats)
		0.814189	1.58699				0.635616	2.09602				0.992602	0.789708
		1.03475	1.32257				0.836094	1.66236				1.02486	0.726175
		1.03834	1.26341				1.1972	1.76375				1.06723	0.988444
		1.11271	1.37116				1.33109	2.2539				0.915309	1.09164
	Mean	1	1.386			Mean	1	1.944			Mean	1	0.899
	Std. Deviation	0.129	0.141			Std. Deviation	0.3205	0.2775			Std. Deviation	0.0642	0.1702
	Std. Error	0.06449	0.07052			Std. Error	0.1602	0.1387			Std. Error	0.0321	0.08511
	Lower 95% CI of mean	0.7948	1.162			Lower 95% CI of mean	0.49	1.502			Lower 95% CI of mean	0.8978	0.6281
	Upper 95% CI of mean	1.205	1.61			Upper 95% CI of mean	1.51	2.386			Upper 95% CI of mean	1.102	1.17
	Mann Whitney test (Sham vs SCI)					Mann Whitney test (Sham vs SCI)					Mann Whitney test (Sham vs SCI)
	P value	0.0286				P value	0.0286				P value	0.4857
