# Supplementary material for: Calpain fosters the hyperexcitability of motoneurons after spinal cord injury and leads to spasticity
Source: eLife. 2019 Dec 9;8:e51404. doi: 10.7554/eLife.51404 (PMC6927741; doi:10.7554/eLife.51404)
Supplement: Figure 3—figure supplement 1—source data 1. [file elife-51404-fig3-figsupp1-data1.xlsx]

## Sheet: Fig. 3B
Time (min)	0	2	4	6	8	10	12	14	16	18	20	22	24	26	28	30	32	34	36	38	40	42	44	46	48	50	52	54	56	58
	nb of events (SLR)																																Repeated Measures ANOVA
Animal 1	62	51	62	51	53	52	47	52	58	49	43	43	46	39	47	50	80	44	48	46	50	37	36	48	52	47	61	60	65	51			Dunnett's Comparison Test	Mean Diff.	q	Significant? P < 0.05?	Summary	95% CI of diff			0 vs 30 min	16.29	4.181	Yes	***	5.027 to 27.54
Animal 2	53	52	48	51	51	50	45	45	42	50	48	39	44	40	52	46	45	49	55	54	52	47	37	45	42	40	47	45	51	48			0 vs 2 min	6.286	1.614	No	ns	-4.973 to 17.54			0 vs 32 min	14.43	2.998	Yes	*	0.5992 to 28.26
Animal 3	45	58	45	48	47	53	45	56	42	57	42	50	48	56	48	56	46	54	49	47	52	51	42	49	60	51	51	49	46	54			0 vs 4 min	6.429	1.336	No	ns	-7.401 to 20.26			0 vs 34 min	11.43	2.934	Yes	*	0.1699 to 22.69
Animal 4	51	40	46	53	56	45	42	50	42	41	46	45	35	47	34	42	40	38	39	33	39	44	34	38	32	44	40	43	31	43			0 vs 6 min	2	0.5134	No	ns	-9.259 to 13.26			0 vs 36 min	3.429	0.7124	No	ns	-10.40 to 17.26
Animal 5	61	45	50	60	62	49	52	55	48	55	55	55	47	41	42	26	24	42	76	68	66	45	54	45	45	59	46	49	66	54			0 vs 8 min	1.143	0.2375	No	ns	-12.69 to 14.97			0 vs 38 min	6.857	1.76	No	ns	-4.402 to 18.12
Animal 6	55	60	58	55	59	52	64	49	50	65	58	55	72	61	59	48	53	53	55	59	63	58	64	55	61	58	62	52	66	67			0 vs 10 min	6.714	1.724	No	ns	-4.544 to 17.97			0 vs 40 min	2.714	0.5639	No	ns	-11.12 to 16.54
Animal 7	84	61	57	79	75	63	73	69	61	67	70	75	55	37	61	29	22	51	65	56	70	54	70	56	60	70	53	55	69	70			0 vs 12 min	6.143	1.276	No	ns	-7.687 to 19.97			0 vs 42 min	10.71	2.75	No	ns	-0.5444 to 21.97
																																	0 vs 14 min	5	1.284	No	ns	-6.259 to 16.26			0 vs 44 min	10.57	2.196	No	ns	-3.258 to 24.40
Mean	58.71	52.43	52.29	56.71	57.57	52	52.57	53.71	49	54.86	51.71	51.71	49.57	45.86	49	42.43	44.29	47.29	55.29	51.86	56	48	48.14	48	50.29	52.71	51.43	50.43	56.29	55.29			0 vs 16 min	9.714	2.018	No	ns	-4.115 to 23.54			0 vs 46 min	10.71	2.75	No	ns	-0.5444 to 21.97
Std. Deviation	12.58	7.892	6.651	10.53	9.163	5.538	11.59	7.697	7.895	9.173	10.01	11.9	11.53	9.281	9.416	11.07	19.5	6.047	12.12	11.16	10.82	6.976	14.57	6.218	11.09	10.32	8.018	5.827	14.14	9.827			0 vs 18 min	3.857	0.9901	No	ns	-7.402 to 15.12			0 vs 48 min	8.429	1.751	No	ns	-5.401 to 22.26
Std. Error	4.755	2.983	2.514	3.98	3.463	2.093	4.38	2.909	2.984	3.467	3.784	4.497	4.358	3.508	3.559	4.185	7.37	2.286	4.581	4.217	4.088	2.637	5.505	2.35	4.19	3.902	3.03	2.202	5.344	3.714			0 vs 20 min	7	1.454	No	ns	-6.829 to 20.83			0 vs 50 min	6	1.54	No	ns	-5.259 to 17.26
Lower 95% CI of mean	47.08	45.13	46.13	46.97	49.1	46.88	41.85	46.6	41.7	46.37	42.45	40.71	38.91	37.27	40.29	32.19	26.25	41.69	44.08	41.54	46	41.55	34.67	42.25	40.03	43.17	44.01	45.04	43.21	46.2			0 vs 22 min	7	1.797	No	ns	-4.259 to 18.26			0 vs 52 min	7.286	1.514	No	ns	-6.544 to 21.12
Upper 95% CI of mean	70.35	59.73	58.44	66.45	66.05	57.12	63.29	60.83	56.3	63.34	60.97	62.72	60.24	54.44	57.71	52.67	62.32	52.88	66.5	62.18	66	54.45	61.61	53.75	60.54	62.26	58.84	55.82	69.36	64.37			0 vs 24 min	9.143	1.9	No	ns	-4.687 to 22.97			0 vs 54 min	8.286	2.127	No	ns	-2.973 to 19.54
																																	0 vs 26 min	12.86	3.3	Yes	*	1.598 to 24.12			0 vs 56 min	2.429	0.5046	No	ns	-11.40 to 16.26
																																	0 vs 28 min	9.714	2.018	No	ns	-4.115 to 23.54			0 vs 58 min	3.429	0.8801	No	ns	-7.830 to 14.69
Time (min)	0	2	4	6	8	10	12	14	16	18	20	22	24	26	28	30	32	34	36	38	40	42	44	46	48	50	52	54	56	58
	nb of events (LLR)																																Dunnett's Comparison Test	Mean Diff.	q	Significant? P < 0.05?	Summary	95% CI of diff
Animal 1	4498	4197	4507	4687	3947	3645	4157	3686	4286	4176	4240	2324	3014	2917	4169	2978	3183	3475	2891	3375	2064	2499	2656	2937	1591	2357	2401	2262	2136	1832			0 vs 2	730.9	2.14	No	ns	-256.1 to 1718			0 vs 30	1978	5.793	Yes	***	991.4 to 2965
Animal 2	4583	4443	4441	4057	3878	4084	3963	3996	3844	3918	3746	3905	3734	3721	3741	4004	3960	3890	3760	3738	3839	3477	3417	3522	3293	3316	3433	3328	3474	2960			0 vs 4	397	0.9547	No	ns	-797.8 to 1592			0 vs 32	1977	4.754	Yes	***	782.0 to 3172
Animal 3	6771	6187	5657	5679	5412	5625	4392	5330	5874	5974	4205	4480	5274	4127	5947	4820	4624	3924	4093	3286	3805	4036	4464	4376	3520	4274	4008.5	3545.5	4250	3948			0 vs 6	6.286	0.01841	No	ns	-980.7 to 993.3			0 vs 34	1281	3.751	Yes	**	293.9 to 2268
Animal 4	5054	4769	4736	4656	4387	5104	5419	4482	4703	4732	3987	3866	4177	3760	3423	3844	2957	3262	3842	3597	3685	3589	3275	3686	3066	3291	3480	3159	2932	2774			0 vs 8	-57.14	0.1374	No	ns	-1252 to 1138			0 vs 36	1601	3.849	Yes	**	405.9 to 2796
Animal 5	5698	5218	5706	6171	7377	7200	7503	4063	4062	5614	4219	5273	3206	4335	3792	2304	2815	5286	4108	4792	4160	2841	3420	4997	4873	4821	3314	4201	4959	3342			0 vs 10	308.6	0.9036	No	ns	-678.4 to 1296			0 vs 38	1443	4.227	Yes	***	456.4 to 2430
Animal 6	5914	2988	5438	6017	4899	2890	3729	2925	4687	2984	3287	2730	2849	3387	4740	2540	2684	3384	2465	3650	3095	2953	2476	2423	1943	2401	2257	2911	2742	2105			0 vs 12	201.6	0.4847	No	ns	-993.2 to 1396			0 vs 40	1756	4.222	Yes	***	560.8 to 2950
Animal 7	3130	2730	2384	4337	6148	4940	5074	2596	2444	3744	3654	3349	1858	2556	2410	1309	1587	3461	3284	3106	2711	1918	2082	3392	3519	3373	2090	2898	3569	2306			0 vs 14	1224	3.585	Yes	**	237.3 to 2211			0 vs 42	2048	5.997	Yes	***	1061 to 3035
																																	0 vs 16	821.1	1.975	No	ns	-373.7 to 2016			0 vs 44	1980	4.761	Yes	***	784.9 to 3175
Mean	5093	4362	4696	5086	5150	4784	4891	3868	4271	4449	3905	3704	3445	3543	4032	3114	3116	3812	3492	3649	3337	3045	3113	3619	3115	3405	2998	3186	3437	2752			0 vs 18	643.7	1.885	No	ns	-343.3 to 1631			0 vs 46	1474	4.315	Yes	***	486.6 to 2461
Std. Deviation	1178	1212	1150	852.4	1274	1417	1300	922.8	1040	1062	360	1009	1086	637.4	1105	1190	968.8	696.9	631.7	550.6	746.1	716.8	786.9	859.5	1091	902.6	738.5	604.5	951	740.1			0 vs 20	1187	2.855	No	ns	-7.666 to 2382			0 vs 48	1978	4.756	Yes	***	782.8 to 3172
Std. Error	445.2	458.1	434.8	322.2	481.4	535.5	491.2	348.8	393.2	401.3	136.1	381.4	410.6	240.9	417.8	449.8	366.2	263.4	238.8	208.1	282	270.9	297.4	324.9	412.5	341.2	279.1	228.5	359.5	279.7			0 vs 22	1389	4.066	Yes	**	401.7 to 2376			0 vs 50	1688	4.942	Yes	***	700.9 to 2675
Lower 95% CI of mean	4003	3241	3632	4298	3972	3474	3689	3015	3309	3467	3572	2771	2440	2954	3009	2014	2220	3167	2908	3140	2647	2382	2385	2824	2106	2570	2315	2627	2558	2068			0 vs 24	1648	3.963	Yes	**	453.2 to 2843			0 vs 54	1906	5.582	Yes	***	919.2 to 2893
Upper 95% CI of mean	6182	5483	5760	5875	6328	6094	6093	4722	5234	5431	4238	4637	4449	4133	5054	4215	4012	4456	4076	4158	4027	3708	3841	4414	4124	4240	3681	3745	4317	3437			0 vs 26	1549	4.537	Yes	***	562.3 to 2536			0 vs 52	2095	5.038	Yes	***	900.1 to 3290
																																	0 vs 28	1061	2.551	No	ns	-134.0 to 2256			0 vs 56	1655	3.98	Yes	**	460.3 to 2850
																																									0 vs 58	2340	6.852	Yes	***	1353 to 3327

## Sheet: Fig. 3C
Time (min)	0	3	6	9	12	15	18	21	24	27	30	33	36	39	42	45	48	51	54	57					Repeated Measures ANOVA
	nb of events (SLR)																								Dunnett's Comparison Test	Mean Diff.	q	Significant? P < 0.05?	Summary	95% CI of diff
Animal 1	52	39	46	41	54	49	48	45	44	46	49	38	43	43	40	37	42	30	35	41					0 vs 3	6.889	2.05	No	ns	-2.975 to 16.75
Animal 2	72	65	65	64	59	57	56	66	75	65	55	61	73	57	70	74	64	60	82	59					0 vs 6	1.111	0.3306	No	ns	-8.753 to 10.98
Animal 3	66	74	66	70	63	61	62	57	68	66	55	70	73	71	69	70	58	65	57	53					0 vs 9	9.333	2.777	No	ns	-0.5306 to 19.20
Animal 4	75	59	78	62	65	58	71	83	62	66	60	72	83	82	73	79	73	74	74	72					0 vs 12	4.667	1.389	No	ns	-5.197 to 14.53
Animal 5	76	79	83	75	83	72	79	61	67	78	72	73	73	80	80	83	85	74	75	79					0 vs 15	13.33	3.968	Yes	**	3.469 to 23.20
Animal 6	70	58	66	55	55	51	59	71	74	64	69	56	61	64	61	63	49	59	56	58					0 vs 18	7.889	2.347	No	ns	-1.975 to 17.75
Animal 7	100	91	98	88	94	76	96	106	89	92	88	105	111	111	97	108	96	99	102	99					0 vs 21	8.222	2.447	No	ns	-1.642 to 18.09
Animal 8	107	99	115	94	87	87	82	74	91	95	88	84	82	90	88	102	101	72	89	85					0 vs 24	5.889	1.752	No	ns	-3.975 to 15.75
Animal 9	81	73	72	66	97	68	75	62	76	83	78	72	73	89	78	74	78	66	81	71					0 vs 27	4.889	1.455	No	ns	-4.975 to 14.75
																									0 vs 30	9.444	2.81	No	ns	-0.4195 to 19.31
Mean	77.67	70.78	76.56	68.33	73	64.33	69.78	69.44	71.78	72.78	68.22	70.11	74.67	76.33	72.89	76.67	71.78	66.56	72.33	68.56					0 vs 33	7.556	2.248	No	ns	-2.308 to 17.42
Std. Deviation	16.83	18.14	20.29	16.13	17.17	12.45	14.96	17.44	14.16	15.58	14.49	18.5	18.18	20.19	16.33	20.88	20.35	18.14	20.1	17.78					0 vs 36	3	0.8927	No	ns	-6.864 to 12.86
Std. Error	5.61	6.048	6.762	5.377	5.723	4.15	4.988	5.815	4.719	5.193	4.83	6.168	6.06	6.729	5.443	6.96	6.782	6.046	6.7	5.926					0 vs 39	1.333	0.3968	No	ns	-8.531 to 11.20
Lower 95% CI of mean	64.73	56.83	60.96	55.93	59.8	54.76	58.27	56.04	60.9	60.8	57.08	55.89	60.69	60.82	60.34	60.62	56.14	52.61	56.88	54.89					0 vs 42	4.778	1.422	No	ns	-5.086 to 14.64
Upper 95% CI of mean	90.6	84.72	92.15	80.73	86.2	73.9	81.28	82.85	82.66	84.75	79.36	84.33	88.64	91.85	85.44	92.72	87.42	80.5	87.78	82.22					0 vs 45	1	0.2976	No	ns	-8.864 to 10.86
																									0 vs 48	5.889	1.752	No	ns	-3.975 to 15.75
																									0 vs 51	11.11	3.306	Yes	*	1.247 to 20.98
																									0 vs 54	5.333	1.587	No	ns	-4.531 to 15.20
																									0 vs 57	9.111	2.711	No	ns	-0.7529 to 18.98
Time (min)	0	3	6	9	12	15	18	21	24	27	30	33	36	39	42	45	48	51	54	57					Repeated Measures ANOVA
	nb of events (LLR)																								Dunnett's Multiple Comparison Test	Mean Diff.	q	Significant? P < 0.05?	Summary	95% CI of diff
Animal 1	4783	4137	3927	3932	4437	3890	3854	3962	4285	4508	4152	3722	3457	2768	2921	2928	3140	3235	3138	3364					0 vs 3	428.9	0.8531	No	ns	-1047 to 1905
Animal 2	6802	6461	6607	5965	3834	4481	4323	4507	4432	4257	6079	4186	5114	4499	4793	4219	4106	4640	4089	3280					0 vs 6	64.33	0.128	No	ns	-1411 to 1540
Animal 3	6785	5316	6246	5751	5147	5138	4790	4481	5171	4647	5533	5300	5416	4811	5027	4879	4866	5140	5113	5238					0 vs 9	248.4	0.4942	No	ns	-1227 to 1724
Animal 4	5223	5019	4873	4661	4541	3790	3406	3416	5658	5543	4799	5699	5190	5927	5904	6031	5299	6410	6010	5553					0 vs 12	586.9	1.167	No	ns	-888.8 to 2063
Animal 5	5013	4846	6125	5950	6695	7281	6949	6748	6450	6477	5816	5630	4842	5140	4118	2018	1955	3773	3330	3482					0 vs 15	546.2	1.086	No	ns	-929.5 to 2022
Animal 6	5228	4413	5091	4504	2910	3582	3291	3561	3422	3329	4445	3227	4145	3601	3755	3178	3133	3729	3215	2390					0 vs 18	1138	2.264	No	ns	-337.6 to 2614
Animal 7	4655	4791	4962	4467	4343	3619	3150	3161	6359	5273	4561	5419	4847	5643	5602	5693	4979	6065	6599	8630					0 vs 21	697.8	1.388	No	ns	-777.9 to 2173
Animal 8	3419	3439	4518	5157	4637	5868	2672	5524	5221	5233	4527	4331	3687	3909	2980	1229	1052	2743	2190	2375					0 vs 24	396	0.7876	No	ns	-1080 to 1872
Animal 9	4462	4088	3442	3747	4544	3805	3692	4730	1808	1605	1718	1578	4170	85	743	1526	1064	3374	3052	4832					0 vs 27	610.9	1.215	No	ns	-864.8 to 2087
																									0 vs 30	526.7	1.048	No	ns	-949.0 to 2002
Mean	5152	4723	5088	4904	4565	4606	4014	4454	4756	4541	4626	4344	4541	4043	3983	3522	3288	4345	4082	4349					0 vs 33	808.7	1.608	No	ns	-667.0 to 2284
Std. Deviation	1077	863.9	1071	843.7	1014	1269	1269	1133	1476	1412	1280	1363	698.1	1789	1611	1779	1652	1294	1499	1981					0 vs 36	611.3	1.216	No	ns	-864.4 to 2087
Std. Error	359	288	356.8	281.2	337.9	423.1	423	377.8	492.1	470.6	426.7	454.5	232.7	596.5	537	592.9	550.6	431.2	499.5	660.4					0 vs 39	1110	2.207	No	ns	-366.0 to 2585
Lower 95% CI of mean	4324	4059	4265	4255	3786	3630	3039	3583	3621	3456	3642	3296	4004	2667	2744	2155	2018	3351	2930	2827					0 vs 42	1170	2.326	No	ns	-306.0 to 2645
Upper 95% CI of mean	5980	5387	5911	5552	5345	5582	4989	5326	5891	5627	5609	5392	5077	5418	5221	4890	4558	5340	5234	5872					0 vs 45	1630	3.242	Yes	*	154.2 to 3106
																									0 vs 48	1864	3.707	Yes	**	388.3 to 3340
																									0 vs 51	806.8	1.605	No	ns	-668.9 to 2282
																									0 vs 54	1070	2.129	No	ns	-405.3 to 2546
																									0 vs 57	802.9	1.597	No	ns	-672.8 to 2279

## Sheet: Fig. 3D
Time (min)	0	4	8	12	16	20	24	28	32	36	40	44	48	52	56		Repeated Measures ANOVA
	nb of events (SLR)																Dunnett's Comparison Test	Mean Diff.	q	Significant? P < 0.05?	Summary	95% CI of diff
Animal 1	58	57	57	54	48	57	53	57	56	56	52	48	55	56	50		0 vs 4	3.167	0.8742	No	ns	-7.288 to 13.62
Animal 2	53	57	55	60	58	51	58	63	64	50	71	65	60	57	68		0 vs 8	1.5	0.4141	No	ns	-8.955 to 11.95
Animal 3	57	60	57	57	46	56	57	62	59	51	57	58	60	55	58		0 vs 12	1.5	0.4141	No	ns	-8.955 to 11.95
Animal 4	63	56	64	56	55	56	52	61	50	60	59	65	57	55	62		0 vs 16	4.333	1.196	No	ns	-6.122 to 14.79
Animal 5	48	35	41	45	40	44	41	48	58	42	44	50	51	54	51		0 vs 20	3.167	0.8742	No	ns	-7.288 to 13.62
Animal 6	106	101	102	104	112	102	117	85	105	88	105	85	96	89	88		0 vs 24	1.167	0.3221	No	ns	-9.288 to 11.62
																	0 vs 28	1.5	0.4141	No	ns	-8.955 to 11.95
Mean	64.17	61	62.67	62.67	59.83	61	63	62.67	65.33	57.83	64.67	61.83	63.17	61	62.83		0 vs 32	-1.167	0.3221	No	ns	-11.62 to 9.288
Std. Deviation	21.1	21.61	20.69	20.88	26.35	20.67	27.14	12.24	19.96	15.98	21.66	13.44	16.44	13.76	14.06		0 vs 36	6.333	1.748	No	ns	-4.122 to 16.79
Std. Error	8.616	8.82	8.449	8.523	10.76	8.438	11.08	4.998	8.147	6.524	8.842	5.486	6.71	5.615	5.741		0 vs 40	-0.5	0.138	No	ns	-10.95 to 9.955
Lower 95% CI of mean	42.02	38.33	40.95	40.76	32.18	39.31	34.52	49.82	44.39	41.06	41.94	47.73	45.92	46.56	48.08		0 vs 44	2.333	0.6442	No	ns	-8.122 to 12.79
Upper 95% CI of mean	86.31	83.67	84.38	84.58	87.49	82.69	91.48	75.51	86.28	74.6	87.4	75.94	80.42	75.44	77.59		0 vs 48	1	0.2761	No	ns	-9.455 to 11.45
																	0 vs 52	3.167	0.8742	No	ns	-7.288 to 13.62
																	0 vs 56	1.333	0.3681	No	ns	-9.122 to 11.79
Time (min)	0	4	8	12	16	20	24	28	32	36	40	44	48	52	56		Repeated Measures ANOVA
	nb of events (LLR)																Dunnett's Comparison Test	Mean Diff.	q	Significant? P < 0.05?	Summary	95% CI of diff
Animal 1	2904	3645	3039	1683	2147	3697	2004	3085	1456	1974	2611	3697	4548	3205	3876.5		0 vs 4	-525.2	1.234	No	ns	-1754 to 703.3
Animal 2	4937	6975	5228	5140	5747	5068	6628	5584	5626	5617	5973	5792	5233	5487	5360		0 vs 8	64.17	0.1508	No	ns	-1164 to 1293
Animal 3	2880	4069	3030	3947	4233	4735	4254	5053	4279	4119	3820	3229	3549	4090	3819.5		0 vs 12	426.2	1.001	No	ns	-802.3 to 1655
Animal 4	4263	3985	3749	3436	4678	4967	6638	7079	4694	4089	4473	4602	4339	4423	4177		0 vs 16	81.17	0.1907	No	ns	-1147 to 1310
Animal 5	4896	4428	4637	4445	4498	4776	4665	4234	4935	4220	4330	4658	4351	4215	4673		0 vs 20	-277.2	0.6512	No	ns	-1506 to 951.3
Animal 6	7125	7054	6937	5797	5215	5425	5753	5232	5108	5047	4118	4665	5758	5852	6326		0 vs 24	-489.5	1.15	No	ns	-1718 to 739.0
																	0 vs 28	-543.7	1.277	No	ns	-1772 to 684.8
Mean	4501	5026	4437	4075	4420	4778	4990	5045	4350	4178	4221	4441	4630	4545	4705		0 vs 32	151.2	0.3552	No	ns	-1077 to 1380
Std. Deviation	1579	1560	1505	1441	1238	584.6	1763	1339	1486	1241	1087	891.2	771.2	971.8	980.5		0 vs 36	323.2	0.7593	No	ns	-905.3 to 1552
Std. Error	644.6	637.1	614.4	588.3	505.5	238.7	719.8	546.6	606.7	506.5	443.8	363.8	314.8	396.7	400.3		0 vs 40	280	0.6579	No	ns	-948.5 to 1508
Lower 95% CI of mean	2844	3388	2857	2562	3120	4164	3140	3640	2790	2876	3080	3505	3820	3525	3676		0 vs 44	60.33	0.1418	No	ns	-1168 to 1289
Upper 95% CI of mean	6158	6664	6016	5587	5719	5392	6841	6449	5909	5480	5362	5376	5439	5565	5734		0 vs 48	-128.8	0.3027	No	ns	-1357 to 1100
																	0 vs 52	-44.5	0.1046	No	ns	-1273 to 1184
																	0 vs 56	-204.5	0.4805	No	ns	-1433 to 1024

## Sheet: Fig. 3F
Time (min)	10	20	30	40	50	60			Time (min)	10	20	30	40	50	60			Time (min)	10	20	30	40	50	60
	Amplitude (% of control)									Frequency (Hz)									Duration (ms)
Animal 1	202.752	210.519	190.996	161.601	161.863	146.274			Animal 1	0.0297407	0.0343776	0.0417307	0.0399925	0.0529507	0.0491621			Animal 1	11234.3	11922.5	11245.9	11260	8589.23	14431.8
Animal 2	170.783	97.529	44.3607	46.1867	88.0769	84.6397			Animal 2	0.032	0.033	0.039	0.0436	0.012	0.0195			Animal 2	9164	12955	19510	13939	10528	6245
Animal 3	63.1431	65.8196	46.448	57.2311	21.2161	17.595			Animal 3	0.038357	0.036409	0.0410945	0.0346356	0.0479607	0.0337266			Animal 3	12831.2	10603.4	9775.2	9493	5921.77	5694.16
Animal 4	114.93	190.869	185.821	257.786	268.527	118.152			Animal 4	0.0249	0.0212	0.028	0.041	0.027	0.038			Animal 4	9468	12451	7901	8229	8317	7093
Animal 5	98.8194	79.136	48.9276	184.96	74.403	98.7917			Animal 5	0.0305745	0.0297597	0.0299305	0.0171882	0.0435077	0.0277918			Animal 5	11672.7	8643.74	16898.2	18527.2	8357.39	6258.64
Animal 6	36.1225	44.1285	37.2859	39.6305	28.1561	34.7031			Animal 6	0.0202051	0.0441013	0.0171232	0.0159969	0.0306971	0.00520439			Animal 6	9114.3	7349.6	4671.38	5373.69	6514.2	4675.62
Animal 7	77.0387	69.0521	97.4447	66.4832	59.9222	48.6765			Animal 7	0.053402	0.0480574	0.0414436	0.0467503	0.061221	0.0486291			Animal 7	6170.8	5925.47	7177.33	7367.06	7024.21	6564.24
Animal 8	60.1501	68.3133	60.1501	56.9277	52.6313	63.3724			Animal 8	0.058	0.0648	0.056	0.0254	0.032	0.03			Animal 8	6267	5494	5751	7932	6052	5672
Animal 9	76.2617	100.214	54.2425	60.1501	59.0759	48.3349			Animal 9	0.039	0.04	0.0425	0.053	0.0456	0.039			Animal 9	5656	7384	6546	5737	5477	5308
Mean	100	102.8	85.08	103.4	90.43	73.39			Mean	0.03624	0.03908	0.03742	0.03528	0.03922	0.03233			Mean	9064	9192	9942	9762	7420	6882
Std. Deviation	54.67	58.19	61.07	78.05	78.34	41.89			Std. Deviation	0.01254	0.01245	0.01106	0.01307	0.0151	0.01394			Std. Deviation	2591	2862	5128	4235	1642	2919
Std. Error	18.22	19.4	20.36	26.02	26.11	13.96			Std. Error	0.00418	0.004152	0.003687	0.004357	0.005032	0.004646			Std. Error	863.6	954.1	1709	1412	547.5	973
Lower 95% CI of mean	57.98	58.11	38.13	43.44	30.21	41.2			Lower 95% CI of mean	0.0266	0.0295	0.02892	0.02524	0.02761	0.02162			Lower 95% CI of mean	7073	6992	6000	6507	6158	4639
Upper 95% CI of mean	142	147.6	132	163.4	150.6	105.6			Upper 95% CI of mean	0.04588	0.04865	0.04593	0.04533	0.05082	0.04305			Upper 95% CI of mean	11056	11392	13883	13017	8683	9126
Repeated Measures ANOVA									Repeated Measures ANOVA									Repeated Measures ANOVA
Dunnett's Multiple Comparison Test	Mean Diff.	q	Significant? P < 0.05?	Summary	95% CI of diff				Dunnett's Multiple Comparison Test	Mean Diff.	q	Significant? P < 0.05?	Summary	95% CI of diff				Dunnett's Multiple Comparison Test	Mean Diff.	q	Significant? P < 0.05?	Summary	95% CI of diff
10 vs 20	-2.842	0.1783	No	ns	-44.61 to 38.92				10 vs 20	-0.002836	0.5787	No	ns	-0.01567 to 0.01000				10 vs 20	-127.8	0.1076	No	ns	-3241 to 2985
10 vs 30	14.92	0.936	No	ns	-26.84 to 56.69				10 vs 30	-0.001183	0.2413	No	ns	-0.01402 to 0.01165				10 vs 30	-877.5	0.7384	No	ns	-3990 to 2235
10 vs 40	-3.44	0.2157	No	ns	-45.20 to 38.32				10 vs 40	0.0009573	0.1953	No	ns	-0.01188 to 0.01379				10 vs 40	-697.7	0.5871	No	ns	-3810 to 2415
10 vs 50	9.57	0.6002	No	ns	-32.19 to 51.33				10 vs 50	-0.002973	0.6066	No	ns	-0.01581 to 0.009864				10 vs 50	1644	1.384	No	ns	-1469 to 4757
10 vs 60	26.61	1.669	No	ns	-15.16 to 68.37				10 vs 60	0.003907	0.7973	No	ns	-0.008929 to 0.01674				10 vs 60	2182	1.836	No	ns	-930.9 to 5294
