# Supplementary material for: Calpain fosters the hyperexcitability of motoneurons after spinal cord injury and leads to spasticity
Source: eLife. 2019 Dec 9;8:e51404. doi: 10.7554/eLife.51404 (PMC6927741; doi:10.7554/eLife.51404)
Supplement: Figure 3—source data 1. [file elife-51404-fig3-data1.xlsx]

## Sheet: Fig 3G
	Number events SLR
	Sham			SCI
Age	P1 (n = 24 rats)	P2/3 (n = 29 rats)	P4/5 (n = 52 rats)	P1 (n = 6 rats)	P2/3 (n = 10 rats)	P4/5 (n = 52 rats)
	37	45	37	27	40	66								0
	28	46	19	45	26	57
	43	40	40	33	45	16
	24	35	48	42	64	68
	47	43	43	46	35	51
	30	33	44	53	46	45
	31	36	31		54	21
	13	29	16		38	49
	27	33	16		47	33
	27	54	32		43	38
	30	36	41			48
	34	30	28			33
	34	38	17			65
	28	21	14			33
	16	18	39			24
	18	20	34			32
	29	33	33			35
	34	25	25			29
	48	33	28			61
	30	17	30			25
	17	30	50			28
	36	35	42			32
	38	37	17			30
	34	27	12			32
		35	22			29
		37	45			47
		33	14			31
		50	20			40
		16	24			39
			18			34
			25			65
			15			44
			20			41
			53			42
			24			64
			31			24
			25			43
			22			40
			37			36
			28			43
			28			56
			16			40
			17			56
			36			46
			19			58
			28			46
			29			51
			30			46
			40			54
			15			48
			33			34
			11			23
Mean	30.54	33.28	28.1	41	43.8	41.75
Std. Deviation	8.968	9.437	10.85	9.445	10.39	12.95
Std. Error	1.831	1.752	1.504	3.856	3.286	1.795
Lower 95% CI of mean	26.75	29.69	25.08	31.09	36.37	38.15
Upper 95% CI of mean	34.33	36.87	31.12	50.91	51.23	45.35
Two-Way ANOVA (Sham vs SCI)
Bonferroni posttests
Age	Difference	t	P value	Summary
J0/1	10.46	2.078	P > 0.05	ns
J2/3	10.52	2.602	P < 0.05	*
J4/5	13.65	6.314	P<0.001	***

## Sheet: Fig 3H
	Number events LLR
	Sham			SCI
Age	P1 (n = 24 rats)	P2/3 (n = 29 rats)	P4/5 (n = 52 rats)	P1 (n = 6 rats)	P2/3 (n = 10 rats)	P4/5 (n = 52 rats)
	207	160	294	102	9618	11047
	97	291	248	2558	2305	2443
	587	122	266	671	2149	2071
	363	302	636	3023	3997	5907
	714	264	257	4604	2864	4458
	159	175	325	3913	4101	2950
	424	812	121		4157	6609
	316	226	124		3113	1565
	395	412	61		1240	1462
	395	4521	76		3371	4548
	383	440	132			6267
	430	317	98			4091
	478	629	164			6660
	340	471	158			3633
	493	367	46			5831
	360	754	104			4125
	1004	374	59			1909
	299	370	96			18355
	387	387	62			5141
	287	272	64			2538
	257	442	110			2530
	286	161	134			2648
	414	205	78			1180
	418	159	117			2648
		321	90			2423
		243	85			1963
		186	89			1918
		1103	91			4496
		424	404			2290
			330			1587
			141			2361
			138			2460
			86			3927
			68			5556
			199			1150
			129			3058
			428			4076
			529			1833
			444			2162
			357			6289
			413			3132
			652			5126
			425			1428
			443			9970
			283			1077
			328			19595
			320			7372
			558			9916
			395			9729
			1669			2933
			258			3440
			238			1913
Mean	395.5	514.1	258.1	2479	3692	4496
Std. Deviation	183.2	801.1	257.1	1777	2286	3813
Std. Error	37.4	148.8	35.65	725.6	722.9	528.8
Lower 95% CI of mean	318.2	209.4	186.5	613.4	2056	3434
Upper 95% CI of mean	472.9	818.8	329.6	4344	5327	5558
Two-Way ANOVA (Sham vs SCI)
Bonferroni posttests
Age	Difference	t	P value	Summary
P0/1	2083	2.051	P > 0.05	ns
P2/3	3177	3.895	P<0.001	***
P4/5	4238	9.713	P<0.001	***

## Sheet: Fig 3I
	Stimulation Threshold (V)
	Sham			SCI
Age	P1 (n = 8 rats)	P2/3 (n = 17 rats)	P4/5 (n = 48 rats)	P1 (n = 10 rats)	P2/3 (n = 11 rats)	P4/5 (n = 30 rats)
	1.5	2.5	1	1.25	1.25	1.25
	1.75	1.5	1.5	1.75	1.5	1
	2	1.75	2.5	2	0.75	1
		1	3	0.8	1.75	1
		1	1	1	1.25	1
		1.75	2		0.75	1
		1	2.25			1.25
		1	2			1.5
		1.75	2			1
		1.25	2.25			1.25
		0.75	2.75			2
		2.1	1.75			1.5
			2			2
			2			1
			2.25			0.5
			2			0.75
			1.5			0.5
			1.75			0.5
			1.75			1.2
			1.25			0.75
			1.5			1
			2.25			0.6
			2.75			1.8
			1.25			0.4
			1.25			0.2
			1.25
			2.25
			1.25
			1.25
			2
			1
			1.5
			1.25
			0.75
			0.75
			0.75
			0.75
			1
			0.75
			1.25
			1
			2
			1.5
Mean	1.75	1.446	1.622	1.36	1.208	1.038
Std. Deviation	0.25	0.534	0.6035	0.5042	0.4005	0.4729
Std. Error	0.1443	0.1542	0.09203	0.2255	0.1635	0.09457
Lower 95% CI of mean	1.129	1.107	1.436	0.7339	0.788	0.8428
Upper 95% CI of mean	2.371	1.785	1.808	1.986	1.629	1.233
Two-Way ANOVA (Sham vs SCI)
Bonferroni posttests
Age	Difference	t	P value	Summary
J0/1	-0.39	0.9873	P > 0.05	ns
J2/3	-0.2375	0.8782	P > 0.05	ns
J4/5	-0.5841	4.294	P<0.001	***

## Sheet: Fig 3M
	Frequency (Hz)
	Sham			SCI
Age	P1 (n = 12 rats)	P2/3 (n = 11 rats)	P4/5 (n = 10 rats)	P1 (n = 7 rats)	P2/3 (n = 12 rats)	P4/5 (n = 17 rats)
	0.0210009	0	0.00491468	0.112705	0.0629235	0.0314514
	0.034124	0.0116	0.0170083	0.0515097	0.018	0.0522816
	0.0131703	0	0.00194939	0.056274	0.0288462	0.0317634
	0.030156	0.089864	0.0345938	0.102239	0.0520637	0.0786441
	0.00671572	0	0	0.0841719	0.0234444	0.0904079
	0.0534731	0	0	0.110006	0.0423104	0.0916217
	0.0268335	0.0408178	0	0.0674215	0.0286969	0.108902
	0.0812707	0.0527934	0		0.0460697	0.0450598
	0.0243068	0.0204023	0		0.180885	0.0422382
	0.0462316	0	0		0.0502291	0.0497103
	0.0122657	0			0.0688356	0.0502938
	0				0.0456309	0.0288983
						0.0265625
						0.00696623
						0.0193586
						0.0201713
						0.0138669
Mean	0.02913	0.01959	0.005847	0.08348	0.05399	0.04636
Std. Deviation	0.02259	0.02976	0.01141	0.02559	0.04284	0.02977
Std. Error	0.006522	0.008974	0.003609	0.009674	0.01237	0.00722
Lower 95% CI of mean	0.01477	-0.0004063	-0.002317	0.0598	0.02677	0.03106
Upper 95% CI of mean	0.04348	0.03958	0.01401	0.1071	0.08121	0.06167
Two-Way ANOVA (Sham vs SCI)
Bonferroni posttests
Age	Difference	t	P value	Summary
P0/1	0.05435	3.905	P<0.001	***
P2/3	0.03441	2.817	P < 0.05	*
P4/5	0.04052	3.475	P<0.01	**

## Sheet: Fig 3N
	Amplitude (% of sham)
	Sham			SCI
Age	P1 (n = 12 rats)	P2/3 (n = 11 rats)	P4/5 (n = 10 rats)	P1 (n = 7 rats)	P2/3 (n = 12 rats)	P4/5 (n = 17 rats)
	51.5332	0	19.6219	155.207	258.696	166.035
	168.883	37.8339	12.2766	577.595	378.339	52.9903
	9.71316	0	20.8421	321.353	438.122	91.2381
	68.897	39.4755	9.63213	73.0196	44.1081	36.2323
	117.749	0	0	278.624	343.36	77.7996
	17.0206	0	0	37.8339	121.1	42.204
	44.1347	14.995	0	158.154	53.1767	134.772
	116.564	35.6966	0		56.998	656.622
	124.494	22.4867	0		404.416	177.13
	353.55	0	0		97.2326	82.9694
	127.461	0			284.985	165.935
	0				189.882	1042.66
						402.286
						903.975
						695.758
						695.03
						845.982
Mean	100	13.68	6.237	228.8	222.5	368.8
Std. Deviation	96.51	17.13	8.653	184.3	147.3	353.5
Std. Error	27.86	5.166	2.736	69.67	42.52	85.74
Lower 95% CI of mean	38.68	2.17	0.04724	58.36	129	187
Upper 95% CI of mean	161.3	25.19	12.43	399.3	316.1	550.6
Two-Way ANOVA (Sham vs SCI)
Bonferroni posttests
Age	Difference	t	P value	Summary
P0/1	128.8	1.347	P > 0.05	ns
P2/3	208.9	2.488	P < 0.05	*
P4/5	362.6	4.524	P<0.001	***

## Sheet: Fig 3O
	Duration (ms)
	Sham			SCI
Age	P1 (n = 12 rats)	P2/3 (n = 11 rats)	P4/5 (n = 10 rats)	P1 (n = 7 rats)	P2/3 (n = 12 rats)	P4/5 (n = 17 rats)
	4345.47	0	5373	2703.28	3497.76	4776.17
	5706.3	3011	3613.4	8182.53	8227	11402.8
	5298.23	0	1783.97	8891.42	10975.1	12529.2
	4303.72	1653.67	1823.73	3944.85	3883.64	5348.73
	6677.67	0	0	8575.06	6959.64	6860.72
	4005.55	0	0	3481.81	4604.12	3966.03
	5267.75	3596.21	0	5899.85	10586.7	4629.89
	4733.93	1710.87	0		5667.51	12206.2
	3148.37	2420.7	0		4136	4870.52
	7569.02	0	0		3638.91	5368.24
	7327.86	0			6224.48	4304.15
	0				4653.46	12922
						4958.24
						24436.6
						8965.94
						9486.34
						9018.21
Mean	4865	1127	1259	5954	6088	8591
Std. Deviation	2038	1399	1902	2620	2616	5174
Std. Error	588.2	421.7	601.6	990.2	755.2	1255
Lower 95% CI of mean	3571	187	-101.5	3531	4426	5931
Upper 95% CI of mean	6160	2066	2620	8377	7750	11252
Two-Way ANOVA (Sham vs SCI)
Bonferroni posttests
Age	Difference	t	P value	Summary
P0/1	1089	0.7168	P > 0.05	ns
P2/3	4961	3.721	P<0.01	**
P4/5	7332	5.76	P<0.001	***
