# Supplementary material for: Calpain fosters the hyperexcitability of motoneurons after spinal cord injury and leads to spasticity
Source: eLife. 2019 Dec 9;8:e51404. doi: 10.7554/eLife.51404 (PMC6927741; doi:10.7554/eLife.51404)
Supplement: Figure 4—figure supplement 1—source data 1. [file elife-51404-fig4-figsupp1-data1.xlsx]

## Sheet: Fig. 4B
	amplitude INAP			threshold INAP
	control	control+MDL		control	control+MDL
	152.6	173.7		-47	-46.3
	322.1	344.2		-51.5	-53
	998	935.5		-50.9	-51.7
	276.7	242.1		-58	-57.4
	263.8	296.2		-59.7	-61.3
	311.3	300.3		-61.3	-61.7
Mean	387.4	382		-54.73	-55.23
Std. Deviation	305.1	277.4		5.717	6.01
Std. Error	124.6	113.3		2.334	2.454
Lower 95% CI of mean	67.19	90.87		-60.73	-61.54
Upper 95% CI of mean	707.6	673.1		-48.73	-48.93
Wilcoxon test (control vs control+MDL)
P value	0.8438			0.3125

## Sheet: Fig. 4D
	EIPSP			EIPSP-Vrest
	control (n = 7 cells)	control+MDL		control (n = 7 cells)	control+MDL
	-69.37	-67.11		3.59	5.84
	-72.68	-71.81		-0.98	0.41
	-70.61	-70.3		2.91	2.11
	-76.63	-83.61		-4.64	-11.58
	-76.28	-74.55		-6.1	-4.17
	-66.75	-71.9		5.63	1.82
	-70.58	-70.43		4.15	2.94
Mean	-71.84	-72.82		0.6514	-0.3757
Std. Deviation	3.616	5.259		4.601	5.79
Std. Error	1.367	1.988		1.739	2.189
Lower 95% CI of mean	-75.19	-77.68		-3.604	-5.731
Upper 95% CI of mean	-68.5	-67.95		4.907	4.98
Wilcoxon test (control vs control+MDL)
P value	0.9375			0.8125
