# Supplementary material for: Calpain fosters the hyperexcitability of motoneurons after spinal cord injury and leads to spasticity
Source: eLife. 2019 Dec 9;8:e51404. doi: 10.7554/eLife.51404 (PMC6927741; doi:10.7554/eLife.51404)
Supplement: Figure 4—figure supplement 2—source data 1. [file elife-51404-fig4-figsupp2-data1.xlsx]

## Sheet: Fig. 4B
		Relative protein level
	calpain concentration (U)	oligo (240 Kda)	mono (140 Kda)
	0	1	1
	0.5	0.464	0.381
	1	0.4	0.273
	2	0.4	0.227
	3	0.509	0.247
	5	0.28	0.162

## Sheet: Fig. 4C
	Quantif oligo (240 Kda)			Quantif oligo (140 Kda)
concentration calpain (U)	0u	2u		0u	2u
	100	40		100	22.7
	68.7	52		42.9	30.7
	84.6	35.6		138.8	55.7
	93.8	25		118.3	41.9
	152.9	34.4		92.6	49.6
	49.2	18.7		93.4	30.7
	121.6	33.8		87.6	41.1
	129.2	29.3		126.4	64.3
Mean	100	33.6		100	42.09
Std. Deviation	33.71	9.99		29.4	14
Std. Error	11.92	3.532		10.39	4.949
Lower 95% CI of mean	71.82	25.25		75.42	30.39
Upper 95% CI of mean	128.2	41.95		124.6	53.79
Mann Whitney test (0U vs 2U)
P value	0.0003			0.0011
