# Supplementary material for: Calpain fosters the hyperexcitability of motoneurons after spinal cord injury and leads to spasticity
Source: eLife. 2019 Dec 9;8:e51404. doi: 10.7554/eLife.51404 (PMC6927741; doi:10.7554/eLife.51404)
Supplement: Figure 4—source data 1. [file elife-51404-fig4-data1.xlsx]

## Sheet: Fig. 4C
	Nb events SLR			Nb events LLR			Mono ampli (% of control)
	SCI (n = 6 rats)	SCI+MDL		SCI (n = 6 rats)	SCI+MDL		SCI (n = 6 rats)	SCI+MDL
	35	15		1091	294		42.1955	65.0429
	38	34		1797	909		97.976	205.832
	39	36		2948	341		81.3036	91.3894
	21	21		1500	457		52.8988	30.4631
	42	38		2667	1011		121.441	127.616
	51	44		1517	819		204.185	100.858
Mean	37.67	31.33		1920	638.5		100	103.5
Std. Deviation	9.832	11.02		728.8	311.3		58.7	60.03
Std. Error	4.014	4.499		297.5	127.1		23.96	24.51
Lower 95% CI of mean	27.35	19.77		1155	311.8		38.4	40.53
Upper 95% CI of mean	47.98	42.9		2685	965.2		161.6	166.5
Wilcoxon test (SCI vs SCI+MDL)
P value	0.0313			0.0313			0.6875

## Sheet: Fig. 4E
	Amplitude (% ofcontrol)			Frequency (Hz)			Duration (ms)
	SCI (n = 6 rats)	SCI+MDL		SCI (n = 6 rats)	SCI+MDL		SCI (n = 6 rats)	SCI+MDL
	155.832	0		0.00696623	0		24436.6	0
	119.938	57.6006		0.0193586	0.0210887		8965.94	4614.73
	119.813	64.476		0.0201713	0.00183145		9486.34	6253.7
	145.834	137.601		0.0138669	0.0104001		9018.21	7240.91
	32.7327	0		0.0456309	0		4653.46	0
	25.8504	0		0.0245115	0		12713.3	0
Mean	100	43.28		0.02175	0.005553		11546	3018
Std. Deviation	56.62	55.08		0.01317	0.008616		6817	3411
Std. Error	23.12	22.49		0.005375	0.003518		2783	1393
Lower 95% CI of mean	40.58	-14.53		0.007933	-0.003489		4392	-561.5
Upper 95% CI of mean	159.4	101.1		0.03557	0.0146		18699	6598
Wilcoxon test (SCI vs SCI+MDL)
P value	0.0313			0.0313			0.0313

## Sheet: Fig. 4F
	quantification 250 Kd			quantification 120 Kd
	(% of SCI)			(% of SCI)
	SCI (n = 11 rats)	SCI+MDL (n = 12 rats)		SCI (n = 11 rats)	SCI+MDL (n = 12 rats)
	79.9451	93.4641		140.826	86.6371
	101.81	90.2189		96.192	51.3068
	98.4974	111.161		113.254	36.2292
	119.748	98.0919		49.7277	8.8563
	117.248	93.1256		83.0616	61.4393
	85.3701	100.69		107.315	105.59
	97.382	135.734		109.624	21.9293
		100.48			111.42
	118.022	126.176		202.206	79.9082
	98.8343	149.067		78.3823	73.0444
	106.284	77.6454		79.3763	73.2846
	76.8593	91.9646		40.035	33.6711
Mean	100	105.7		100	61.94
Std. Deviation	14.89	21.03		44.44	32.38
Std. Error	4.49	6.071		13.4	9.346
Lower 95% CI of mean	90	92.29		70.14	41.37
Upper 95% CI of mean	110	119		129.9	82.51
Mann Whitney test (SCI vs SCI+MDL)
P value	0.8294			0.0337

## Sheet: Fig. 4G
		Quantification IF
		(% of SCI)
		SCI (n = 71 cells)	SCI+MDL (n = 71 cells)
		1.22457	1.01032
		1.14333	0.77292
		1.11811	0.911346
		0.768085	0.654666
		1.19693	0.577003
		1.58223	1.21711
		1.21007	0.783558
		1.17261	0.861742
		1.14279	1.20777
		0.885038	1.01158
		1.03066	0.610267
		0.922934	0.918302
		0.912545	0.640534
		1.0206	1.07355
		1.15017	1.07907
		1.10407	0.707788
		0.90969	0.943995
		1.0959	1.17777
		1.23298	1.16832
		1.10945	0.835465
		1.34676	0.961897
		1.11943	1.08165
		0.974878	0.647931
		1.03401	1.63365
		0.778006	0.913586
		1.02262	0.785609
		0.723781	1.00367
		0.689807	0.670052
		0.849487	0.659382
		0.670738	0.693245
		0.752155	0.604604
		1.37211	0.908902
		0.785072	0.683348
		0.878634	0.949973
		0.935581	1.02084
		0.834771	0.880606
		0.6964	0.790498
		0.603011	1.03142
		1.21772	0.598153
		1.66628	0.544893
		1.1611	0.594831
		1.21866	0.414632
		0.878166	0.653886
		0.998995	0.714011
		0.923405	0.64824
		1.2359	0.429325
		1.18486	0.937572
		1.07239	0.608034
		1.0287	0.437426
		0.965101	0.511631
		0.853759	0.496166
		1.14458	0.471057
		1.24255	0.970309
		0.816709	0.799771
		0.827054	0.72227
		0.872047	0.670351
		0.873941	0.605264
		1.06653	0.815569
		1.1327	0.79146
		0.795387	0.910412
		0.554537	0.724111
		1.01169	0.909553
		0.541264	0.828159
		1.1393	0.839819
		0.622605	0.702386
		1.03731	0.920661
		0.795861	0.591184
		1.29823	0.520205
		0.797264	0.629741
		1.08844	0.670281
		0.936976	0.747642
Mean		1	0.796
Std. Deviation		0.2232	0.2219
Std. Error		0.02649	0.02634
Lower 95% CI of mean		0.9472	0.7434
Upper 95% CI of mean		1.053	0.8485
t-test (SCI vs SCI+MDL)
P value		< 0.0001

## Sheet: Fig. 4H
	amplitude INAP			threshold INAP
	SCI (n = 7 cells)	SCI+MDL		SCI (n = 7 cells)	SCI+MDL
	616.7	559.9		-53.77	-51.84
	495.7	316.3		-53.26	-53.11
	531	488.8		-52.35	-52.28
	320.5	338.9		-54.16	-55.47
	783.1	632.9		-61.46	-61.28
	633.8	507.5		-57.61	-58.17
	852	732.3		-56.61	-58.22
Mean	604.7	510.9		-55.6	-55.77
Std. Deviation	178.9	149.6		3.185	3.58
Std. Error	67.62	56.54		1.204	1.353
Lower 95% CI of mean	439.2	372.6		-58.55	-59.08
Upper 95% CI of mean	770.2	649.3		-52.66	-52.46
Wilcoxon test (SCI vs SCI+MDL)
P value	0.0313			0.9375

## Sheet: Fig. 4I
	quantification 240 Kd			quantification 140 Kd
	(% of SCI)			(% of SCI)
	SCI (n = 7 rats)	SCI+MDL (n = 8 rats)		SCI (n = 7 rats)	SCI+MDL (n = 8 rats)
	77.8979	170.81		81.8636	118.077
	130.18	132.503		101.583	109.278
	110.383	118.889		120.701	107.269
	81.5394	140.64		95.8525	106.805
	103.435	112.24		97.6688	98.9529
	110.574	100.921		109.212	103.561
	85.9903	107.668		93.1193	94.9294
		114.255			101.658
Mean	100	124.7		100	105.1
Std. Deviation	19.01	22.66		12.35	7.06
Std. Error	7.184	8.012		4.667	2.496
Lower 95% CI of mean	82.42	105.8		88.58	99.16
Upper 95% CI of mean	117.6	143.7		111.4	111
Mann Whitney test
P value	0.0401			0.281

## Sheet: Fig. 4J
	Quantification IF
	(% of SCI)
	SCI (n = 47 slices)	SCI+MDL (n = 47 slices)
	0.80663	0.858167
	0.799403	1.03092
	1.15395	1.15576
	0.88346	1.39309
	1.17465	1.40103
	0.928027	1.27171
	1.14738	0.880335
	1.40877	1.54462
	1.39703	1.35528
	1.20192	1.57228
	1.52177	1.09794
	1.00266	1.09397
	0.825738	0.586787
	0.804752	0.897205
	0.93537	0.989864
	0.975861	0.754308
	1.093	0.804431
	0.970306	0.885003
	0.68086	0.808109
	0.795263	0.97815
	0.716401	0.909228
	0.930805	0.842402
	0.885723	0.815836
	0.761226	1.09646
	1.0737	0.989286
	1.03879	1.32242
	1.08788	1.32234
	1.24278	0.981596
	1.03285	1.38939
	0.801049	1.0091
	1.03691	1.22375
	0.991189	1.19051
	0.722728	1.16237
	1.07337	1.28926
	1.49062	1.51355
	0.918936	1.2614
	0.887433	0.965922
	0.863606	0.959891
	0.684628	1.02924
	1.1685	1.12022
	0.803647	1.0513
	0.942558	1.23226
	1.13392	1.19129
	1.0593	1.01192
	0.921971	1.12874
	1.11977	0.830032
	1.1029	1.08293
Mean	1	1.091
Std. Deviation	0.2027	0.223
Std. Error	0.02957	0.03252
Lower 95% CI of mean	0.9405	1.026
Upper 95% CI of mean	1.06	1.157
t test (SCI vs SCI+MDL)
P value	0.0205

## Sheet: Fig. 4K
	EIPSP			EIPSP-Vrest
	SCI (n = 7 cells)	SCI+MDL		SCI (n =7 cells)	SCI+MDL
	-66.59	-68.91		6.85	5.29
	-73.77	-79.7		-0.89	-6.21
	-67.32	-70.36		5.8	2.37
	-62.68	-65.89		9.88	6.93
	-68.42	-71.72		2.17	0
	-64.91	-68.02		6.3	4.14
	-77.03	-86.35		-5.19	-16.24
Mean	-68.67	-72.99		3.56	-0.5314
Std. Deviation	5.035	7.346		5.19	8.156
Std. Error	1.903	2.777		1.961	3.083
Lower 95% CI of mean	-73.33	-79.79		-1.24	-8.074
Upper 95% CI of mean	-64.02	-66.2		8.36	7.011
Wilcoxon test (SCI vs SCI+MDL)
P value	0.0156			0.0156
