# Supplementary material for: Calpain fosters the hyperexcitability of motoneurons after spinal cord injury and leads to spasticity
Source: eLife. 2019 Dec 9;8:e51404. doi: 10.7554/eLife.51404 (PMC6927741; doi:10.7554/eLife.51404)
Supplement: Figure 5—figure supplement 1—source data 1. [file elife-51404-fig5-figsupp1-data1.xlsx]

## Sheet: Fig. 5C
	Nb events SLR					Nb events LLR					Mono ampli (% of control)
	control (n = 8 rats)	Vera (100 nM)	riluzole (5 µM)			control (n = 8 rats)	Vera (100 nM)	riluzole (5 µM)			control (n = 8 rats)	Vera (100 nM)	riluzole (5 µM)
	38.4	41	39.125			140.2	1196.6	40.25			133.636	146.221	158.542
	42.4	38.6	33			111.4	1727.2	154.75			76.8528	57.4727	70.867
	21	37.2	14.5			269.4	4558.2	156.75			22.8818	21.7219	27.3794
	51.4	48.8	39.625			344.2	7782.8	35.375			62.791	70.3636	62.4518
	38	45.4	27.625			133.8	2567.8	135.25			72.1801	68.755	58.0855
	42.2	63.4	41.875			348.8	2314.2	463.875			115.558	98.5856	114.584
	26	37.6	26.2			287.6	6518.6	330			158.127	145.805	165.283
	32.6	39.6	20.8			192	6173	276.4			157.973	154.855	149.274
Mean	36.5	43.95	30.34			228.4	4105	199.1			100	95.47	100.8
Std. Deviation	9.717	8.832	9.783			96.24	2493	147.9			48.92	49.09	52.93
Std. Error	3.435	3.123	3.459			34.03	881.5	52.29			17.3	17.36	18.71
Lower 95% CI of mean	28.38	36.57	22.16			148	2020	75.44			59.1	54.43	56.55
Upper 95% CI of mean	44.62	51.33	38.52			308.9	6189	322.7			140.9	136.5	145.1
One Way ANOVA
Dunn's Comparison Test	Difference in rank sum	Significant? P < 0.05?	Summary		Dunn's Comparison Test	Difference in rank sum	Significant? P < 0.05?	Summary		Dunn's Comparison Test	Difference in rank sum	Significant? P < 0.05?	Summary
control vs vera	-6	No	ns		control vs vera	-13	Yes	**		control vs vera	6	No	ns
control vs riluzole	6	No	ns		control vs riluzole	-2	No	ns		control vs riluzole	3	No	ns
vera vs riluzole	12	Yes	**		vera vs riluzole	11	Yes	*		vera vs riluzole	-3	No	ns

## Sheet: Fig. 5E
	Amplitude (% of SCI)			Frequency (Hz)			Duration (ms)
	control (n = 6 rats)	vera		control (n = 6 rats)	vera		control (n = 6 rats)	vera
	410.355	1791.94		0.00194939	0.0751846		1783.97	4415.31
	189.645	3196.29		0.0345938	0.0559256		1823.73	9277.92
	0	1324.08		0	0.0830653		0	5837.75
	0	1246.2		0	0.0718442		0	3523.57
	0	2673.89		0	0.0333733		0	4778.78
	0	1157.42		0	0.0764073		0	5201.93
Mean	100	1898		0.006091	0.06597		601.3	5506
Std. Deviation	169.9	848.7		0.01399	0.01835		931.6	2004
Std. Error	69.37	346.5		0.00571	0.007492		380.3	818.1
Lower 95% CI of mean	-78.32	1008		-0.008586	0.04671		-376.4	3403
Upper 95% CI of mean	278.3	2789		0.02077	0.08523		1579	7609
Wilcoxon test (control vs vera)
P value	0.0313			0.0313			0.0313
