# Supplementary material for: Calpain fosters the hyperexcitability of motoneurons after spinal cord injury and leads to spasticity
Source: eLife. 2019 Dec 9;8:e51404. doi: 10.7554/eLife.51404 (PMC6927741; doi:10.7554/eLife.51404)
Supplement: Figure 5—figure supplement 2—source data 1. [file elife-51404-fig5-figsupp2-data1.xlsx]

## Sheet: Fig. 5C
	Nb events SLR			Nb events LLR			Mono ampli (% of control)
	SCI (n = 6 rats)	Nifedinie		SCI (n = 6 rats)	Nifedinie		SCI (n = 6 rats)	Nifedinie
	55.8	58.4		4818.4	3426.2		116.12	95.1138
	65.6	74		3382.6	2368.6		142.795	157.98
	43.4	55.4		1506.4	2094.4		76.9949	122.524
	34.4	47.4		1287	642.2		83.6434	99.6904
	33	53.6		615.8	1180		83.2451	89.5414
	36.2	34.8		254.4	800.4		97.201	107.036
Mean	44.73	53.93		1977	1752		100	112
Std. Deviation	13.24	12.91		1764	1074		25.21	25.26
Std. Error	5.407	5.271		720.3	438.4		10.29	10.31
Lower 95% CI of mean	30.84	40.38		125.7	625.1		73.55	85.47
Upper 95% CI of mean	58.63	67.48		3829	2879		126.5	138.5
Wilcoxon's test (SCI vs nifedipine)
P value	0.0625			0.4375			0.3125

## Sheet: Fig. 5E
	Amplitude (% of SCI)			Frequency (Hz)			Duration (ms)
	SCI (n = 14 rats)	Nifedinie		SCI (n = 14 rats)	Nifedinie		SCI (n = 14 rats)	Nifedinie
	59.9596	89.3516		0.03	0.0455		5672	11491
	52.9056	137.79		0.039	0.064		5108	7105
	185.63	96.2246		0.0332099	0.0387411		5079.19	8840.04
	135.084	145.784		0.0319029	0.0535839		5540	8813
	205.626	304.501		0.064	0.0104		8440	10672
	17.5176	36.4461		0.036	0.031		7619	6630
	78.6765	220.898		0.04521	0.08413		7255.08	4523.92
	16.9415	85.8951		0.17403	0.05637		3359.56	1710.44
	20.2217	41.4192		0.09925	0.02246		3316.46	3288.3
	74.9731	234.595		0.01544	0.06944		6630.93	8607.28
	53.999	317.222		0.15944	0.09159		6986.22	11913.2
	63.2163	217.148		0.10279	0.07		6212.74	12773.9
	317.551	166.735		0.14488	0.1137		6198.34	1737.98
	117.697	111.889		0.21449	0.03721		5135.52	2449.56
Mean	100	157.6		0.08497	0.05629		5897	7183
Std. Deviation	85.84	89.87		0.0646	0.02832		1476	3886
Std. Error	22.94	24.02		0.01726	0.007568		394.6	1039
Lower 95% CI of mean	50.44	105.7		0.04768	0.03995		5044	4939
Upper 95% CI of mean	149.6	209.5		0.1223	0.07264		6749	9426
Wilcoxon's test (SCI vs nifedipine)
P value	0.0419			0.2166			0.2166

## Sheet: Fig. 5H
	Nb events SLR			Nb events LLR			Mono ampli (% of control)
	SCI (n = 7 rats)	Bay K		SCI (n = 7 rats)	Bay K		SCI (n = 7 rats)	Bay K
	27.2	26.8		73	264.2		182.553	182.553
	19.2	46.6		176	1631.2		115.282	98.1223
	37.2	55		232.8	788.4		104.785	110.079
	50.8	50.2		369.2	3167.8		33.7723	29.2085
	27.2	36.8		97.6	853.4		141.479	135.089
	16.4	28.6		161.8	223.8		29.5736	27.383
	35	30.4		177.2	422.4		92.5544	105.881
Mean	30.43	39.2		183.9	1050		100	98.33
Std. Deviation	11.73	11.36		97.53	1051		55.07	55.45
Std. Error	4.433	4.295		36.86	397.1		20.81	20.96
Lower 95% CI of mean	19.58	28.69		93.74	78.42		49.07	47.04
Upper 95% CI of mean	41.28	49.71		274.1	2022		150.9	149.6
Wilcoxon's test (SCI vs Nifedipine)
P value	0.2188			0.0156			0.6875

## Sheet: Fig. 5J
	Amplitude (% of SCI)			Frequency (Hz)			Duration (ms)
	SCI (n = 7 rats)	Nifedinie		SCI (n = 7 rats)	Nifedinie		SCI (n = 7 rats)	Nifedinie
	222.411	618.915		0.00491468	0.0312064		3613.4	15276
	377.589	885.904		0.0170083	0.025622		1783.97	12510.5
	0	1101.84		0	0.0273299		0	11373.2
	0	952.524		0	0.0241435		0	6852
	0	814.663		0	0.0277549		0	5812
	0	345.614		0	0.0206861		0	6643
Mean	100	786.6		0.003654	0.02612		899.6	9744
Std. Deviation	162.5	268.4		0.006831	0.003569		1509	3856
Std. Error	66.34	109.6		0.002789	0.001457		616	1574
Lower 95% CI of mean	-70.54	504.9		-0.003515	0.02238		-683.9	5698
Upper 95% CI of mean	270.5	1068		0.01082	0.02987		2483	13791
Wilcoxon's test (SCI vs Nifedipine)
P value	0.0313			0.0313			0.0313
