# Supplementary material for: Calpain fosters the hyperexcitability of motoneurons after spinal cord injury and leads to spasticity
Source: eLife. 2019 Dec 9;8:e51404. doi: 10.7554/eLife.51404 (PMC6927741; doi:10.7554/eLife.51404)
Supplement: Figure 5—source data 1. [file elife-51404-fig5-data1.xlsx]

## Sheet: Fig 5C
	Nb events SLR			Nb events LLR			Mono ampli (% of control)
	SCI (n = 8 rats)	SCI+riluzole		SCI (n = 8 rats)	SCI+riluzole		SCI (n = 8 rats)	SCI+riluzole
	62.2	39.6		4741.2	62.4		68.6714	118.695
	35.2	31.2		2564.2	93.4		136.118	88.8942
	55.8	45.8		4818.4	65.4		86.4598	86.3484
	65.6	14.8		3382.6	109.6		105.219	94.1448
	43.4	22.6		1506.4	98.8		154.304	137.232
	20.6	22.6		5643.4	109.2		54.6539	60.6205
	55	28.4		3564	54.6		114.606	107.841
	55.8	16.6		4405.6	79.4		79.9523	74.5903
Mean	49.2	27.7		3828	84.1		100	96.05
Std. Deviation	15.15	10.85		1347	21.7		34.05	24.53
Std. Error	5.356	3.835		476.2	7.672		12.04	8.673
Lower 95% CI of mean	36.54	18.63		2702	65.96		71.53	75.54
Upper 95% CI of mean	61.86	36.77		4954	102.2		128.5	116.6
Wilcoxon test (SCI vs SCI+riluzole)
P value	0.0156			0.0078			0.3828

## Sheet: Fig 5E
	Amplitude (% of SCI)			Frequency (Hz)			Duration (ms)
	SCI (n = 8 rats)	SCI+riluzole		SCI (n = 8 rats)	SCI+riluzole		SCI (n = 8 rats)	SCI+riluzole
	305.699	23.2823		0.0450598	0.00299		12206.2	4626.85
	82.4651	0		0.0422382	0		4870.52	0
	38.6275	0		0.0497103	0		5368.24	0
	56.38	0		0.0423104	0		4604.12	0
	24.7571	0		0.0286969	0		10586.7	0
	26.5362	30.8222		0.0460697	0.00707		5667.51	3420.77
	188.281	0		0.180885	0		4136	0
	77.2532	0		0.0502938	0		4304.15	0
Mean	100	6.763		0.06066	0.001258		6468	1006
Std. Deviation	98.31	12.68		0.04904	0.002571		3114	1890
Std. Error	34.76	4.484		0.01734	0.000909		1101	668.3
Lower 95% CI of mean	17.81	-3.841		0.01966	-0.000892		3864	-574.4
Upper 95% CI of mean	182.2	17.37		0.1017	0.003407		9071	2586
Wilcoxon test (SCI vs SCI+riluzole)
P value	0.0156			0.0078			0.0078

## Sheet: Fig. 5H
	Nb events SLR			Nb events LLR			Mono ampli (% of control)
	SCI (n = 15 rats)	SCI+4,9-AH-TTX		SCI (n = 15 rats)	SCI+4,9-AH-TTX		SCI (n = 15 rats)	SCI+4,9-AH-TTX
	50.8	45.6		5424.6	828.2		43.3314	38.315
	44.4	41.2		2270.6	89.8		58.8563	41.9908
	62.4	47.4		3327.4	520.4		117.929	156.33
	40.2	45.2		638.6	249.2		65.8188	169.39
	40.8	43.4		8921.4	3305.8		211.468	201.089
	45.8	29.4		755.2	106.4		20.4116	25.0821
	102.333	55.5556		2549.56	2104.44		141.179	178.959
	74.4	26.375		478.3	73.375		140.823	77.0713
	56.1	28.6		889.6	588.6		61.6783	80.6909
	112.5	68.25		10314.4	999.667		155.196	156.249
	80.6	50.7		2388.6	1241.1		149.783	187.648
	122	45.3		3270.8	3389.9		80.0667	162.216
	79	45.6		1106.3	2048.8		69.951	81.2611
	86.5	57.3		3432.2	4150.4		89.5564	134.991
	71.6667	28.625		2386.67	1442.88		93.9515	221.098
Mean	71.3	43.9		3210	1409		100	127.6
Std. Deviation	26.21	11.86		2936	1323		49.39	61.87
Std. Error	6.768	3.062		758	341.5		12.35	15.47
Lower 95% CI of mean	56.78	37.33		1585	676.8		73.68	94.63
Upper 95% CI of mean	85.82	50.47		4836	2142		126.3	160.6
Wilcoxon test (SCI vs SCI+4,9-AH-TTX)
P value	0.0004			0.0103			0.0319

## Sheet: Fig. 5J
	Amplitude (% of SCI)			Frequency (Hz)			Duration (ms)
	SCI	SCI+4,9-AH-TTX		SCI	SCI+4,9-AH-TTX		SCI	SCI+4,9-AH-TTX
	98.9836	49.0961		0.05801	0.01934		4130.19	2262.44
	130.457	67.7637		0.0902	0.05899		4776.85	3651.08
	83.6932	24.6617		0.02826	0		4584.14	2534.6
	60.0011	25.662		0.0527	0.00516		1910.36	1106.41
	54.2222	0		0.22628	0		857.342	0
	39.6236	29.0461		0.10368	0.06081		3548.69	3074.1
	123.739	0		0.05817	0		3027.23	0
	48.2421	27.3326		0.08132	0.0339		3379.04	2801.34
	359.393	110.183		0.19572	0.04936		10383.2	5304.39
	289.735	211.27		0.19772	0.07155		5840.83	6490.3
	29.5573	35.8144		0.10335	0.1059		2200.99	2112
	52.6146	0		0.06429	0		2108.66	0
	274.47	58.1909		0.01764	0.00266		5170.07	1598.59
	53.483	37.9665		0.10866	0.12001		3431.37	2710.56
	42.0134	34.998		0.06027	0.0871		2240.99	2237.65
	73.2546	16.2111		0.10054	0.08387		2401.28	1230.12
	54.7849	45.3027		0.10101	0.10369		2390.83	2313.9
	60.4762	76.1341		0.15184	0.14891		3819.79	2726.14
	30.8444	23.1573		0.08182	0.0777		3052.16	2099.12
	40.412	41.3142		0.10778	0.08189		3380.87	3205.9
Mean	100	45.7052		0.09946	0.05554		3631.74	2372.93
Std. Deviation	94.8379	47.3206		0.05564	0.04617		2002.92	1612.34
Std. Error	21.2064	10.5812		0.01244	0.01032		447.866	360.529
Lower 95% CI of mean	55.6145	23.5585		0.07342	0.03393		2694.35	1618.34
Upper 95% CI of mean	144.386	67.8519		0.1255	0.07715		4569.14	3127.53
Wilcoxon test (SCI vs SCI+4,9-AH-TTX)
P value	0.0001			0.0004			< 0,0001

## Sheet: Fig. 5M
	Nb events SLR			Nb events LLR			Mono ampli (% of control)
	SCI	SCI+PCPz		SCI	SCI+PCPz		SCI	SCI+PCPz
	72.7	84.6		3852.8	2037.6		97.5699	67.9481
	82.9	104		3657.4	1094.8		160.076	89.6724
	93.3333	95.6		2788.67	440.4		105.45	141.701
	109.375	123		6119.88	4895.2		48.7642	32.8186
	65.2857	72.8333		6323.71	3106.5		168.804	146.472
	82.5714	81.6		7866.93	7040.8		181.67	168.887
	76.9	32.6		656.8	74.4		52.687	29.0093
	75.25	40.2		1165.33	41		75.1384	35.7717
	113.3	32.6		3384.1	539.6		9.84081	4.30967
Mean	85.7351	74.1148		3979.51	2141.14		100	79.6211
Std. Deviation	16.4717	32.6138		2398.98	2443.57		59.8531	60.0784
Std. Error	5.49057	10.8713		799.661	814.525		19.951	20.0261
Lower 95% CI of mean	73.0738	49.0456		2135.49	262.848		53.9928	33.4408
Upper 95% CI of mean	98.3963	99.184		5823.53	4019.44		146.007	125.801
Wilcoxon test (SCI vs SCI+PCPz)
P value	0.8203			0.0039			0.0742

## Sheet: Fig. 5O
	Amplitude (% of SCI)			Frequency (Hz)			Duration (ms)
	SCI	SCI+PCPz		SCI	SCI+PCPz		SCI	SCI+PCPz
	77.4671	0		0.10756	0		4234.37	0
	50.8702	0		0.14488	0		3090.13	0
	56.062	0		0.12883	0		3106.53	0
	45.9394	0		0.1209	0		4111.95	0
	85.8047	33.0247		0.069	0.02997		6882.03	7430.98
	30.2897	48.0393		0.1432	0.09619		4037.73	5864.31
	63.0836	55.5577		0.05074	0.02933		4178.04	3255.8
	84.9458	62.77		0.1396	0.08792		3067.49	2953.14
	349.629	308.944		0.10385	0.07639		2939.8	3020.89
	216.452	191.88		0.06438	0.11911		3402.91	2737.64
	39.4566	12.9873		0.15295	0.13057		2924.08	5234.99
Mean	100	64.8367		0.11144	0.05177		3815.91	2772.52
Std. Deviation	96.9362	98.2937		0.03579	0.05131		1147.51	2615.35
Std. Error	29.2274	29.6367		0.01079	0.01547		345.987	788.559
Lower 95% CI of mean	34.8774	-1.19795		0.0874	0.0173		3045	1015.5
Upper 95% CI of mean	165.123	130.871		0.13549	0.08625		4586.82	4529.54
Wilcoxon test (SCI vs SCI+PCPz)
P value	0.0029			0.0186			0.1748
