# Supplementary material for: Calpain fosters the hyperexcitability of motoneurons after spinal cord injury and leads to spasticity
Source: eLife. 2019 Dec 9;8:e51404. doi: 10.7554/eLife.51404 (PMC6927741; doi:10.7554/eLife.51404)
Supplement: Figure 6—source data 1. [file elife-51404-fig6-data1.xlsx]

## Sheet: Fig. 6C
	Nb events SLR					Nb events LLR
	control (n = 11 rats)	Vera	Vera+DIOA			control (n = 11 rats)	Vera	Vera+DIOA
	24.6	31.4	38.8			383	678.8	1245.2
	36.6	36.2	33.8			526.8	624.6	1294.6
	31.4	33.6	43.4			309.4	649.2	8039.8
	34	34.6	42.4			412.8	893.8	1345
	13.8	19.4	38			381.8	559.4	1755.2
	36.4	33.6	37.8			777.2	716.4	1853
	34.8	28.8	36.2			436.4	626.6	2953.2
	27.4	27.2	27.8			205	160.2	1036
	34	34.8	37.6			373.4	202.8	2455.4
	7.4	8	14.4			109.4	98.2	362.8
	22.6	22.2	25.8			516	1251	2647
Mean	27.55	28.16	34.18			402.8	587.4	2272
Std. Deviation	9.691	8.602	8.484			174.7	337.1	2059
Std. Error	2.922	2.594	2.558			52.68	101.6	620.8
Lower 95% CI of mean	21.04	22.38	28.48			285.5	360.9	888.4
Upper 95% CI of mean	34.06	33.94	39.88			520.2	813.8	3655
repeated measures one-way ANOVA					repeated measures one-way ANOVA
Dunn's Comparison Test	Difference in rank sum	Significant? P < 0.05?	Summary		Dunn's Comparison Test	Difference in rank sum	Significant? P < 0.05?	Summary
SLR control vs SLR vera	-1	No	ns		LLR control vs SLR vera	-3	No	ns
SLR control vs SLR vera+dioa	-14	Yes	**		LLR control vs SLR vera+dioa	-18	Yes	***
SLR vera vs SLR vera+dioa	-13	Yes	*		LLR vera vs SLR vera+dioa	-15	Yes	**

## Sheet: Fig. 6F
	Nb events SLR					Nb events LLR
	control (n = 6 rats)	DIOA	Vera+DIOA			control (n = 6 rats)	DIOA	Vera+DIOA
	22.6	12.8	53.6			250.4	247.8	4624.4
	34.8	30.8	49			321	337.2	4063
	22.6	25.4	34.4			129	236.4	1467.4
	27.2	11.4	24.4			343.2	381.6	432.8
	22	23.4	49.4			188.2	166.8	7964
	31.4	30.8	29.4			319.8	301	1264.6
Mean	26.77	22.43	40.03			258.6	278.5	3303
Std. Deviation	5.36	8.535	12.18			85.58	77.17	2822
Std. Error	2.188	3.485	4.971			34.94	31.5	1152
Lower 95% CI of mean	21.14	13.48	27.25			168.8	197.5	341.5
Upper 95% CI of mean	32.39	31.39	52.81			348.4	359.4	6264
repeated measures one-way ANOVA					repeated measures one-way ANOVA
Dunn's Comparison Test	Difference in rank sum	Significant? P < 0.05?	Summary		Dunn's Comparison Test	Difference in rank sum	Significant? P < 0.05?	Summary
SLR control vs SLR dioa	3	No	ns		LLR control vs LLR dioa	0	No	ns
SLR control vs SLR dioa vera	-3	No	ns		LLR control vs LLr doa vera	-9	Yes	*
SLR dioa vs SLR dioa vera	-6	No	ns		LLR dioa vs LLr doa vera	-9	Yes	*

## Sheet: Fig. 6H
	Amplitude (% of SCI)			Frequency (Hz)			Duration (ms)
	SCI (n = 19 rats)	Vera+DIOA		SCI (n = 19 rats)	Vera+DIOA		SCI (n = 19 rats)	Vera+DIOA
	0	774.732		0	0.09579		0	3110.8
	170.308	579.085		0.03818	0.11829		2491.13	2438.38
	0	296.123		0	0.10523		0	3575.28
	912.236	683.686		0.00988	0.06551		2797.68	2841.17
	666.891	601.086		0.04751	0.11158		1863.4	3426.2
	0	283.649		0	0.13938		0	3334.13
	0	135.637		0	0.12864		0	2040.35
	0	561.406		0	0.03369		0	7380.56
	70.9124	363.991		0.16123	0.0526		7135.99	8092.23
	79.6537	248.292		0.13521	0.04614		5708.95	10325
	0	1020.37		0	0.08329		0	11421.8
	0	972.934		0	0.04222		0	6411.93
	0	899.075		0	0.05765		0	9341.33
	0	730.437		0	0.06048		0	4668.49
	0	431.269		0	0.06722		0	4546.17
	0	1442.7		0	0.03022		0	7030.42
	0	905.852		0	0.09071		0	9765.17
	0	1270.23		0	0.07912		0	6404.93
	0	566.611		0	0.05913		0	10808.6
Mean	100	672		0.02063	0.0772		1052	6156
Std. Deviation	250.3	352.2		0.04714	0.03237		2108	3109
Std. Error	57.41	80.81		0.01081	0.007425		483.6	713.2
Lower 95% CI of mean	-20.62	502.2		-0.002089	0.06161		36.54	4658
Upper 95% CI of mean	220.6	841.7		0.04335	0.0928		2068	7654
Wilcoxon test	0.0003			0.0094			<0.0001
P value
